# Supplementary material
Source: publisher figshare collection journal article supplement (https://adisjournals.figshare.com/ndownloader/files/36201834)
Supplement: Supplementary file 1 [file 36201834]

## Odevixibat: Adis Evaluation

### Clinical Considerations

- Approved in the USA for pruritus in progressive familial intrahepatic cholestasis (PFIC) and in the EU and UK for PFIC
- Significantly reduces serum bile acids and improves pruritus symptoms relative to placebo
- Improves growth and sleep parameters, as well as quality of life outcomes
- Clinical benefits maintained for up to 72 weeks of treatment, according to an interim analysis of ongoing phase 3 study data
- Generally well tolerated

### Plain Language Summary

#### *Background and rationale*

- Progressive familial intrahepatic cholestasis (PFIC) is a rare inherited cholestatic liver disease that is characterized by disturbed bile homeostasis, pruritus, accumulation of biliary components and potentially fatal liver disease
- Recently, ileal bile acid transporter (IBAT) inhibitors have emerged as a novel non-surgical approach for the treatment of PFIC
- Odevixibat (Bylvay™; Bylvay®), a potent IBAT inhibitor, has been approved in the USA for the treatment of pruritus in PFIC for patients aged  $\geq 3$  months and in the EU and UK for patients aged  $\geq 6$  months with PFIC

#### *Clinical findings*

- In patients with PFIC, odevixibat significantly decreased serum bile acids and improved pruritus symptoms compared with placebo
- Improvements in growth and sleep parameters, as well as measures of quality of life were also seen with odevixibat versus placebo
- Odevixibat is generally well tolerated, with most adverse events being mild to moderate in severity

#### *Conclusion*

Odevixibat is a valuable, effective and generally well-tolerated treatment option for patients with PFIC

This plain language summary represents the opinions of the author. For a full list of declarations, including funding and author disclosure statements, please see the full text online. © Springer Nature Switzerland AG 2022.
